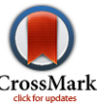

# Coryphoid Palm Leaf Fossils from the Maastrichtian–Danian of Central India with Remarks on Phytogeography of the Coryphoideae (Arecaceae)

Rashmi Srivastava<sup>1\*</sup>, Gaurav Srivastava<sup>1</sup>, David L. Dilcher<sup>2</sup>

<sup>1</sup> Cenozoic Palaeoflorist Laboratory, Birbal Sahni Institute of Palaeobotany, 53 University Road, Lucknow- 226 007, Uttar Pradesh, India, <sup>2</sup> Department of Geology, Indiana University, 1001 E. Tenth St. Bloomington- 47405, Indiana, United States of America

## Abstract

**Premise of research:** A large number of fossil coryphoid palm wood and fruits have been reported from the Deccan Intertrappean beds of India. We document the oldest well-preserved and very rare costapalmate palm leaves and inflorescence like structures from the same horizon.

**Methodology:** A number of specimens were collected from Maastrichtian–Danian sediments of the Deccan Intertrappean beds, Ghughua, near Umariya, Dindori District, Madhya Pradesh, India. The specimens are compared with modern and fossil taxa of the family Arecaceae.

**Pivotal results:** *Sabalites dindoriensis* sp. nov. is described based on fossil leaf specimens including basal to apical parts. These are the oldest coryphoid fossil palm leaves from India as well as, at the time of deposition, from the Gondwana-derived continents.

**Conclusions:** The fossil record of coryphoid palm leaves presented here and reported from the Eurasian localities suggests that this is the oldest record of coryphoid palm leaves from India and also from the Gondwana-derived continents suggesting that the coryphoid palms were well established and wide spread on both northern and southern hemispheres by the Maastrichtian–Danian. The coryphoid palms probably dispersed into India from Europe via Africa during the latest Cretaceous long before the Indian Plate collided with the Eurasian Plate.

**Citation:** Srivastava R, Srivastava G, Dilcher DL (2014) Coryphoid Palm Leaf Fossils from the Maastrichtian–Danian of Central India with Remarks on Phytogeography of the Coryphoideae (Arecaceae). PLoS ONE 9(11): e111738. doi:10.1371/journal.pone.0111738

**Editor:** Qi Wang, Institute of Botany, China

**Received:** June 17, 2014; **Accepted:** October 3, 2014; **Published:** November 13, 2014

This is an open-access article, free of all copyright, and may be freely reproduced, distributed, transmitted, modified, built upon, or otherwise used by anyone for any lawful purpose. The work is made available under the Creative Commons CC0 public domain dedication.

**Data Availability:** The authors confirm that all data underlying the findings are fully available without restriction. All relevant data are within the paper.

**Funding:** These authors have no support or funding to report.

**Competing Interests:** The authors have declared that no competing interests exist.

\* Email: rashmi57.bsip@gmail.com

## Introduction

Palms (Arecaceae/Palmae) are considered an important and characteristic component of tropical rainforest ecosystems having a pantropical distribution [1]. The family has been placed within the commelinid clade of the monocotyledons [2,3], and is composed of five subfamilies: Arecoideae, Calamoideae, Ceroxylloideae, Coryphoideae and Nypoideae [4,5]. The family comprises 188 genera and about 2600 species [5,6,7]. Palm species richness is the highest in tropical Asia (>1200 species) and the higher in the Americas (730 species) than in Africa (only 65 species) [5]. It has been suggested that the low diversity of palms in Africa in contrast to Asia and America is due to Neogene aridification in Africa [8]. However, recent studies suggest *in situ* diversification in other regions like Asia and America etc [9,10]. In Indian subcontinent, palms consist of 20 genera and 88 species [5] with 24 species belonging to 9 genera endemic [11]. Among the five subfamilies of the Arecaceae, Coryphoideae is sister to a clade comprising Arecoideae and Ceroxylloideae. Asmussen et al. [12]

considered Coryphoideae as one of the earliest diverging members of Arecaceae from which both pinnate and palmate leaves may have evolved. However, Baker and Couvreur [9,10] on the basis of molecular data suggest that the divergence of Coryphoideae occurred at about 87 Ma (95% HPD 86–88) in Laurasia in which *Sabalites carolinensis* Berry described from the late Coniacian–early Santonian (85.8–83.5 Ma) of South Carolina, USA was used as a calibration point [13]. Kvaček and Herman [14] recorded *S. longirachis* Kvaček and Herman from the early Campanian of Austria. A large number of fossil records attributed to Coryphoideae in the form of fruit and wood are also reported from the Deccan Intertrappean sediments. These are: *Hyphaeneocarpon indicum* Bande, Prakash and Ambwani [15], *Palmocarpon coryphoidium* Shete and Kulkarni [16], *Palmocaulon costapalmatum* Kulkarni and Patil [17], *P. hyphaeneoides* Shete and Kulkarni [18], *Palmoxylon coryphoides* Ambwani and Mehrotra [19] and *P. hyphaeneoides* Rao and Shete [20].

Here we report very rare and well-preserved costapalmate palm leaves under the organ genus *Sabalites* (*S. dindoriensis* sp. nov.)

from the Deccan Intertrappean sediments (Maastrichtian–Danian) of Central India. This is the oldest fossil record of costapalmate palm leaves from India and the Gondwana-derived continents. The locality bearing the fossils was situated in a low palaeolatitude  $\sim 18.09^\circ$  S near the equator (Fig. 1) [21] when the leaves were deposited. Attempts have also been made to discuss the origin and phyto geography of the subfamily Coryphoideae in Indian context.

### The Deccan Traps: a brief review

The Deccan Traps (Continental Flood Basalt) are one of the largest igneous provinces of the world. The area occupied by the Deccan Traps today is about 500,000 sq km in peninsular India which includes Andhra Pradesh, Gujarat, Karnataka, Madhya Pradesh and Maharashtra (Fig. 2A). The original stretch may have been over 1.5 million sq km including sediments found in the Arabian Sea to the west of Mumbai [22]. The outpouring of magma/lava was associated with the northward voyage of the Indian Plate after it was separated from Gondwana during the Early Cretaceous and moved over the Reunion Hot Spot situated east of Madagascar in the Indian Ocean [23,24]. The extensive volcanic eruptions with associated magma and lava outpouring that formed the Deccan Traps and associated sedimentary beds has been difficult to date and thus is an active topic of discussion among geologists and palaeontologists. Recent studies based on  $^{40}\text{Ar}/^{39}\text{Ar}$  dating indicate that the duration of the volcanism extended from 69–61 Ma and the major eruptions took place between 67–65 Ma [25,26] rather than a short duration of only one million years [27].

The sedimentary sequences between two successive magma/lava flows were deposited in lacustrine, fluvial and palustrine environments during quiescent (inactive) phases of volcanic activity mainly while the Indian Plate was still an isolated land mass moving toward Asia. These are repeated episodic events resulting in the multiple sequences of fossiliferous beds and basalts. The fossiliferous sediments of the intertrappean beds are exposed mainly in Central India, western India and to the south in parts of Andhra Pradesh and Karnataka, including Rajahmundry (Fig. 2A). The age of the Deccan Intertrappean beds was previously thought to be early Palaeogene due to the abundance of angiospermous remains [28,29]. However, microfloral studies

and faunal assemblages suggest a Maastrichtian age for most of the intertrappean exposures but there are a few Palaeocene indicators [30–33]. Currently, based on radiometric dating and planktonic foraminifera, the age of the intertrappean sediments is considered to be upper Maastrichtian–Danian [34–37].

Recent studies of the sedimentary sequences associated with the Deccan Traps (both Infratrappean and Intertrappean) have been conducted to resolve their role in mass extinction at the *K–Pg* boundary. Cripps et al. [38] working on Mumbai Intertrappeans concluded that volcanic activity had hardly any effect on the floristic elements. However, pollen analysis shows distinct floral changes at different stratigraphic levels [32,33].

The flora reported from Deccan Intertrappean beds is unique and one of the richest fossil plant assemblages in India. The fossil plant assemblage includes all the plant groups ranging from algae to angiosperms [39]. Most of the fossil flora (mainly angiosperms) from intertrappean beds is reported from Central India (Madhya Pradesh and Maharashtra) with only a few elements of the flora reported from western India [40–42]. The majority of the plant macrofossils reported from the Deccan Traps are permineralized woods, fruits with only a few leaf impressions [39], however, microfossils have also been recorded [33].

### Materials and Methods

The fossil palm leaves were collected from Umaria near Ghughua ( $23^\circ 7' \text{ N}$ ;  $80^\circ 37' \text{ E}$ ), in the premises of Ghughua Fossil National Park, Dindori District, Madhya Pradesh. The fossil site is situated about 76 km east of Jabalpur and spreads over an area of 27.34 ha in Ghughua and Umaria villages (Fig. 2B). The locality is very rich in permineralized angiospermous woods (both palms and eudicots), but leaves and other plant organs are rarely preserved and thus very rarely found. The studied fossil leaf specimens were first cleaned with a chisel and hammer and then photographed in natural low angled light using a 10 megapixel digital camera (Canon SX110). All the figured fossil specimens (Specimen nos 40073–40077) are housed in the repository of Birbal Sahni Institute of Palaeobotany, Lucknow, India. The fossil leaves were compared with the nearest living relatives in the herbaria of the Central National Herbarium, Howrah, Forest Research Institute, Dehradun, National Botanical Research

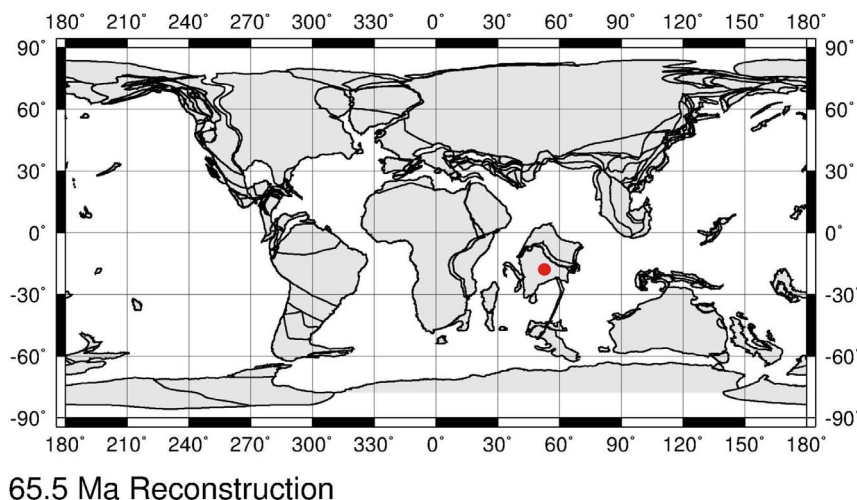

**Figure 1. Palaeocontinental map showing the position of India and fossil locality (red dot) at 65.5 Ma [21].**  
doi:10.1371/journal.pone.0111738.g001

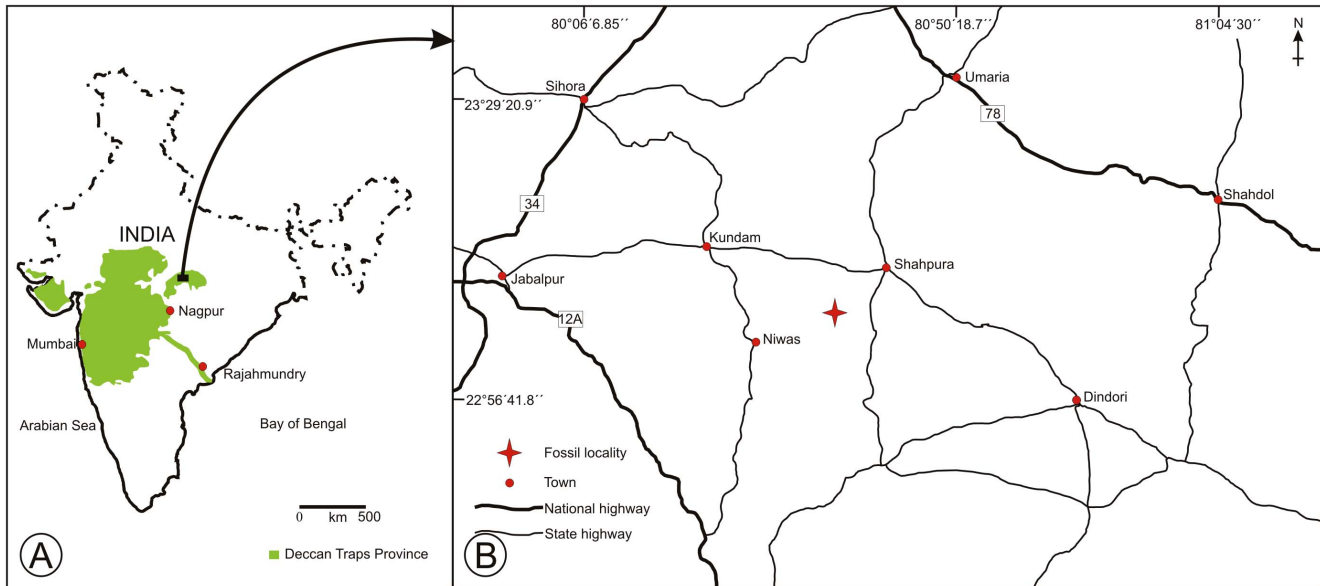

**Figure 2. Map of India showing fossil locality.** A. Map of India showing extent of Deccan traps. B. High resolution map showing the fossil locality (marked by asterisk) [95].

doi:10.1371/journal.pone.0111738.g002

Institute, Lucknow and the website of Royal Botanic Gardens, Kew. Attempts were made to extract pollen from the floral axis but it could not be recovered. The Director of Birbal Sahni Institute of Palaeobotany, Lucknow has permitted to publish the present work (Ref. No. BSIP/RDCC/Publication no. 22).

Read and Hickey [43] gave five basic characters of palm leaves that can be used alone, or in various combinations to differentiate fossil palm leaves. We followed their classification and placed our specimens in the genus *Sabalites* G. Saporta [44] emended Read and Hickey [43], which they proposed for costapalmate fossil palm leaves.

## Results

**Family.** Arecaceae Schultz Sch.

**Subfamily.** Coryphoideae Burnett

**Genus.** *Sabalites* G. Saporta emended Read and Hickey

**Species.** *Sabalites dindoriensis* R. Srivastava, G. Srivastava and D. L. Dilcher, sp. nov.

**Etymology.** The specific epithet is named after the fossil locality.

**Holotype.** BSIP Museum No. 40073, Fig. 3A; designated here.

**Paratypes.** BSIP Museum nos 40074, 40075, 40076, 40077.

**Horizon.** Deccan Intertrappean Beds.

**Type locality.** Umari near Ghughua Fossil National Park, Dindori District, Madhya Pradesh, India.

**Age.** Maastrichtian–Danian.

## Diagnosis

Leaves costapalmate. Costa/petiole very thick at the basal portion and gradually tapers towards apex, petiole robust, unarmed; a number of longitudinal fibre like structures seen on the petiole/costa. Leaf segments plicate, emerging at an acute angle from costa; fused at emerging point. Mid-veins of each segment thick; two orders of veins on either side of mid-vein,

segments near the petiole narrow becoming broader away from the petiole; transverse veins rarely preserved, very fine, perpendicular or obliquely oriented to parallel veins.

**Description.** The species is described based on the five specimens shown in Figures 3–5. One is the basal part having a thick petiole (Fig. 3A), two specimens (Figs 3C, 4C) are the middle-upper part. Apical portions of two specimens (Figs 4A, 5A) have faint impressions of axis bearing flower. The leaf segments are preserved only near the costa, where they are attached, so the complete size and shape of an entire leaf is uncertain.

**Basal part:** Holotype- BSIP Museum No. 40073, Fig. 3A, 3B.

The preserved length of the specimen is about 45 cm and width about 13.5 cm, petiole with costa is about 26 cm long and 4.2 cm broad at the base that gradually tapers towards the apex and shows attached plicate leaf segments, petiole armature not seen. There are numerous longitudinal fibre like structures present on the petiole and costa. About 15 leaf segments arise from the distal portion of the costa and are crowded together. Leaf segments broaden away from the costa, measuring about 1.0–2.0 cm in width. The mid-veins of leaf segments are about 1–1.5 mm thick and two vein orders present on either side of the mid vein. The higher order venation is not preserved due to the coarse matrix. Transverse veins are rarely preserved but wherever visible, they are very fine and are oriented perpendicularly or obliquely to the parallel veins.

**Middle part:** Paratypes- BSIP Museum nos 40074 and 40075, Figs 3C, 4C.

The specimen in Figure 3C shows the middle portion with a preserved length of about 42.5 cm and a width of 14.5 cm. The costa is about 3.3 cm broad at the base and tapers to 0.7 cm distally. Leaf segments are preserved along both sides of costa but their terminal portions are broken. The segments are inserted on the costa and their maximum length is about 20 cm. The specimen illustrated in Figure 4C contains only plicate leaf segments with a few segments flattened on the rock surface. The detached segments have a maximum width of about 5.4 cm.

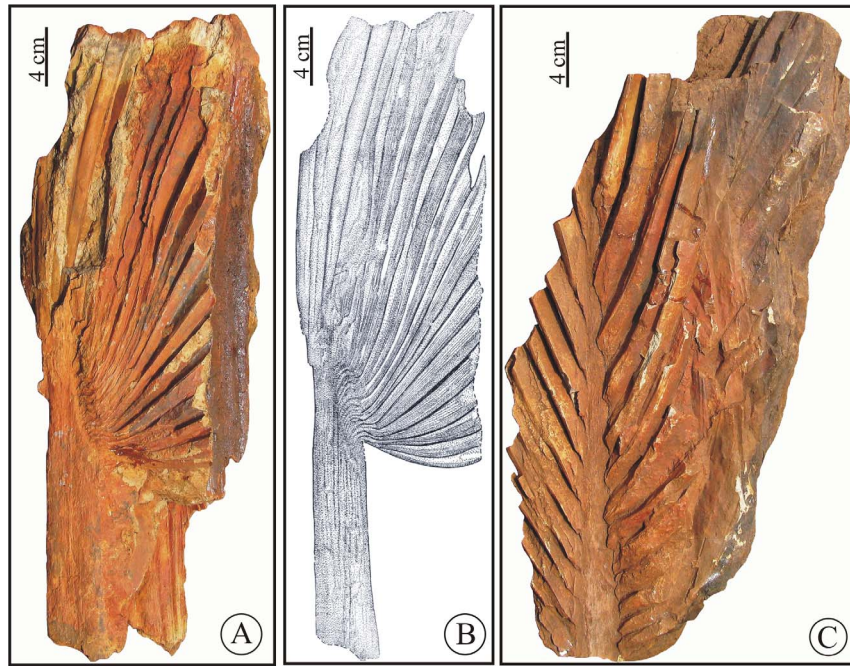

**Figure 3.** *Sabalites dindoriensis* sp. nov. A. Basal portion of *Sabalites dindoriensis* sp. nov. showing thick costa. B. Drawing of the same fossil. C. Middle portion of the fossil leaf showing leaf segments attached to costa.  
doi:10.1371/journal.pone.0111738.g003

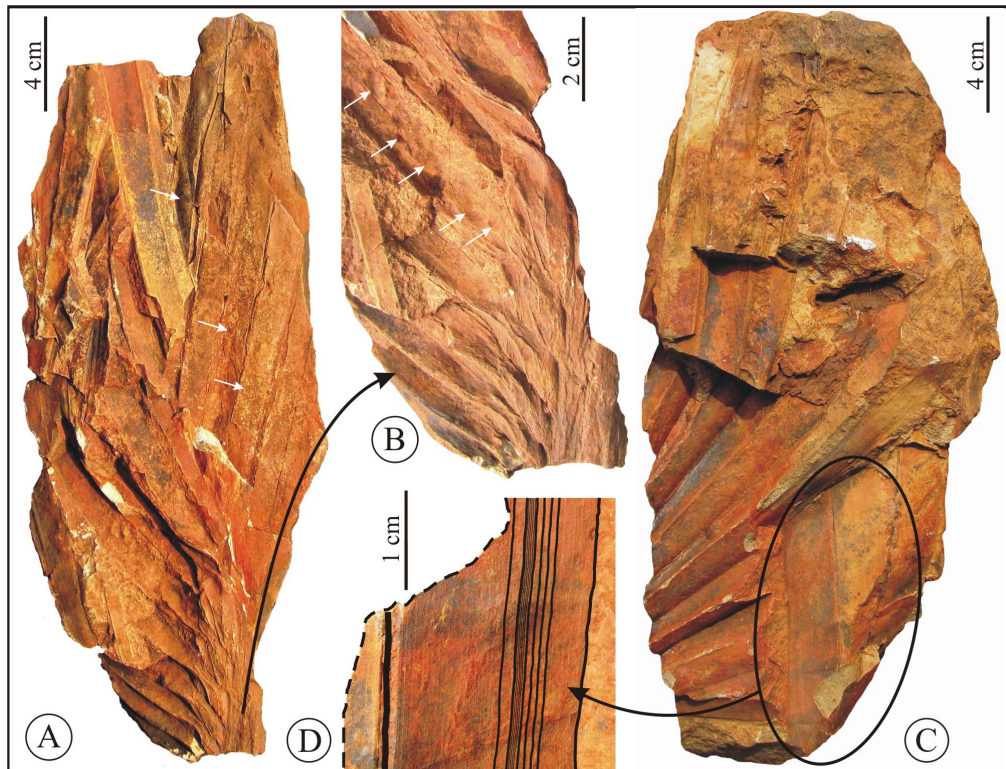

**Figure 4.** *Sabalites dindoriensis* sp. nov. A. Specimen seems to be of apical portion showing faint impressions of rachilla like structure (white arrows). B. Enlarged portion of the same specimen showing rachilla like structure (white arrows). C. Specimen seems to be of middle portion. D. Enlarged portion showing high order venation.  
doi:10.1371/journal.pone.0111738.g004

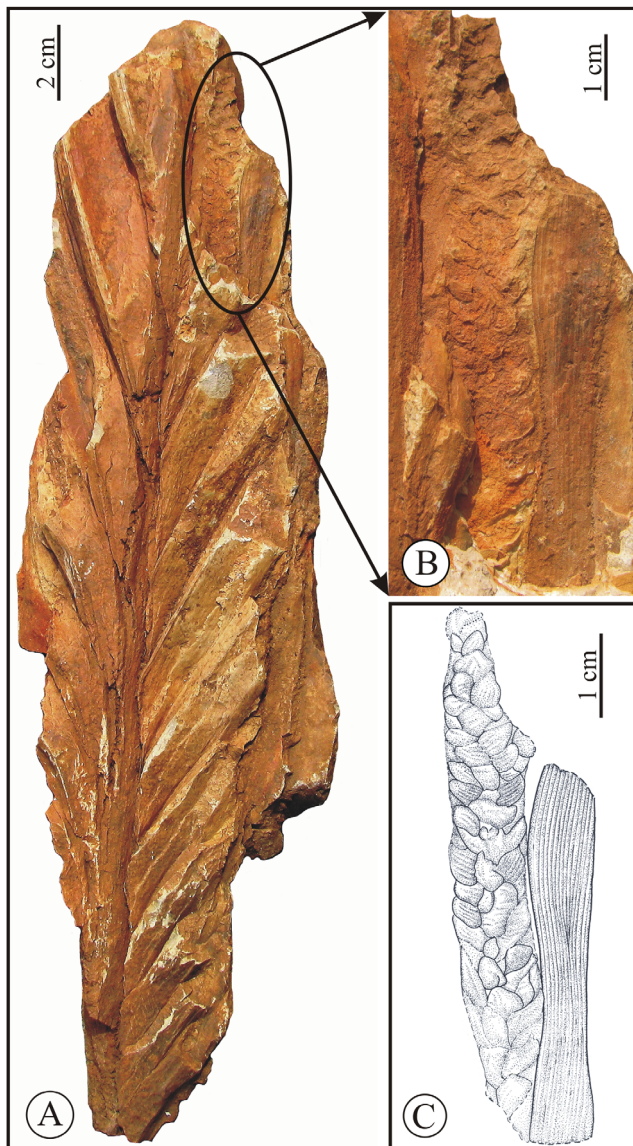

**Figure 5.** *Sabalites dindoriensis* sp. nov. A. Apical portion of the fossil leaf showing tapering costa with leaf segments having rachilla like structure. B. Enlarged portion of the axis bearing flower showing impression of spirally arranged abscised flowers, bract and spatulate rachillar bract. C. Drawing of the axis bearing flower with bract. doi:10.1371/journal.pone.0111738.g005

These leaf segments clearly show a distinct mid-vein with about 16 major parallel veins on either side of mid-vein, each with a minor vein between them (Fig. 4D).

*Apical part:* Paratypes: BSIP Museum nos 40076 and 40077, Figs 4A, 5A.

Specimens (BSIP No. 40076 and 40077) are incomplete and broken. The preserved length is about 30 cm and the width is 7 cm each. The costa tapers gradually from 0.9 cm to 0.3 cm along the apex (Fig. 5A). All the leaf segments are preserved incompletely near the costa; numerous 2° veins run parallel on either side of the midrib.

Also present in this specimen is a poorly preserved impression of a rachilla-like structure (Figs 5A–C) with a preserved length of 9 cm and a width of 1.4 cm. This axis is reminiscent of an

inflorescence after the spirally arranged flowers were abscised with striated bracts probably adanate to axis. A spatulate rachillar bract of preserved length 6.6 cm and width 1.4 cm is present adjacent to the floral axis having numerous parallel veins (Figs 5A–C).

**Affinities.** The diagnostic features of the fossil leaves include: palmate, plicate leaves with long costa (costapalmate) and unarmed petiole. These characters suggest that the fossil leaves have affinities with the subfamily Coryphoideae in the Arecaceae [5]. A number of palm taxa were examined at the Central National Herbarium, Howrah, Forest Research Institute, Dehradun, National Botanical Research Institute, Lucknow and the website of Royal Botanic Gardens, Kew [45] to find species with similar characters. The fossil leaves show resemblance with a number of coryphoid palms with costapalmate leaves in gross morphology such as *Bismarckia nobilis* Hildebr. & Wendl., *Borassus aethiopicum* Mart., *B. flabellifer* L., *Corypha taliera* Roxb., *Hyphaene coriacea* Gaertn. (Fig. 6), *H. dichotoma* Furtado, *H. thebaica* Mart., *Livistona australis* Mart., *L. boninensis* Nakai, *L. carinensis* Dransf. and Uhl, *Sabal bermudana* Bailey and *Trachycarpus martianus* H. Wendl. Except *Bismarckia* and *Sabal* all taxa have armed petiole different from our fossil. The leaves of *Trachycarpus* H. Wendl. are non-costate which differentiates it from the present fossil. The inflorescence like structure of the fossil shows a close resemblance with the *Hyphaene* Gaertn. by having characteristic shape, striated bracteoles and spatulate large bract associated with floral axis which also gets support from the previous fossil records of *Hyphaene* from the same horizon [15,18,20]. However, due to the lack of spines on the petiole of fossil it cannot be assigned exactly to the modern taxa. As Read and Hickey [43] stated that “Since it is very difficult to identify specimens of modern palms accurately from their leaves alone, no attempt should be made to place fossil palm fragments in genera of modern palms unless unquestionably identifiable with them”. Under these circumstances the fossils are placed in the organ genus *Sabalites* G. Saporta [44] proposed for costapalmate fossil leaves.

A number of palm leaves have been described from Upper Cretaceous–Neogene deposits of India under various fossil taxa (table 1) [46–71]. The species attributed to *Amesoneuron* (Goepfert) Read and Hickey [47–53] cannot be compared with the leaves under consideration as they are isolated fragments of lamina with parallel veins but the fragments are not attached to main rachis making it impossible to determine whether they belong to pinnate or palmate leaves. *Malpophyllum dakshinens* [58] is based on anatomical features and *Malpophyllum* sp. [58] is based on a very fragmentary specimen in which costa and other characteristic features are not preserved.

*Phoenicites* Brongniart species (*P. lakhampalii* Guleria and Mehrotra [48]; *P. indica* Guleria et al. [51]; *Phoenicites* sp. [63,64]; *P. siwalikensis* Bonde [65]), palm leaf [55], *Sabalites* sp. [66,67], *Zalaccites jaintiensis* Barman and Duara [71] and the leaf of cf. *Iguanura wallichiana* Srivastava, Mehrotra and Bauer [57] are pinnate leaves and therefore differ from *Sabalites dindoriensis*.

Palmate leaf fossil taxa reported from Indian Upper Cretaceous–Neogene sediments includes *Palmacites*, a taxon for leaves lacking primary costa. Costapalmate forms referred to *Sabalites* and *Sabalophyllum* and two specimens placed in the modern genera, *Livistona* and *Trachycarpus*. The *Palmacites* species (*Palmacites* sp. [50], *P. makumensis* Srivastava, Mehrotra and Bauer [57], *P. khariensis* Lakhampal and Guleria [61], *P. tsokarensis* Paul et al. [62]) lack a costa and therefore differ from *Sabalites dindoriensis*. *Sabalophyllum livistonoides* Bonde [68] is based on a petrified leaf with anatomical features and therefore it could not be compared with *S. dindoriensis*. *Sabalites microphylla*

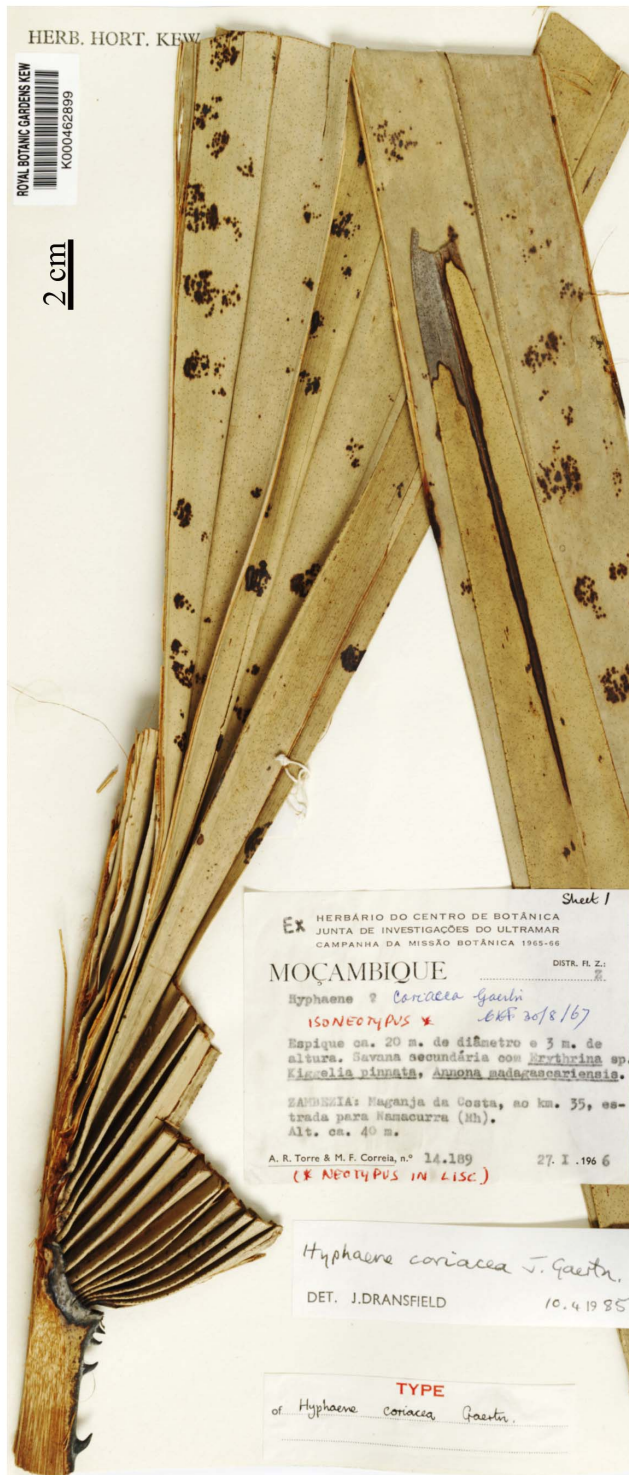

**Figure 6. Modern leaf of *Hyphaene coriacea* (modified after <http://specimens.kew.org/herbarium/K000462899> [45]. doi:10.1371/journal.pone.0111738.g006**

Sahni [66] and *Sabalites* sp. [67] are fragmentary palmate leaves not attached to petiole, so it is not clear whether they are costapalmate. *Trachycarpus ladakhensis* Lakhanpal et al. [69,70] lacks primary costa. *Livistona wadii* Lakhanpal et al. [56] is the only costapalmate leaf reported from late Eocene–Oligocene

sediments of Ladakh Himalaya, it is a smaller leaf with thin costa and narrower leaf segments.

In a detailed work on coryphoid palms from the Eocene of Texas, Daghlian [72] reported a number of fossil palm leaves under various fossil taxa, namely, *Costapalma*, *Palmacites*, *Palustrapalma*, *Sabal* and *Sabalites* based on cuticular features. But none of them show morphological resemblance with the leaves of *Sabalites dindoriensis*. Recently, Zhou et al. [73] reported many coryphoid palm leaves from the Eocene of southern China. But all the specimens are much smaller in size, with intact cuticular structures and short costa. Besides, the fossil records of palms are abundant worldwide and it is not possible to explore all of them here. Therefore, we compare *Sabalites dindoriensis* with those fossil costapalmate leaves that are most similar. *Sabal chinensis* (Endo) Huzioka and Takahashi [74] from the Eocene of Northeast China, Japan and Russia is similar to the basal part of one specimen (Fig. 3A, BSIP Museum no. 40073) in having a thick stout unarmed petiole extending into the lamina (costapalmate) and leaf segments fused at their emerging point. It differs from the present species by having a shorter costa with narrower segments. The specimens of the middle and apical portions of *Sabalites dindoriensis* (Figs 3C, 4A–D and 5A BSIP Museum nos 40074–40077) show a close resemblance to *S. longirachis* [14] reported from the early Campanian of Austria and Maastrichtian of the Pyrénées [75] in having a thick long costa and segments with a similar angle of attachment. However, this species is based on cuticular features and fine venation, none of which are preserved in *S. dindoriensis* leaves. Therefore, in the absence of any similar leaves we propose the new species, *Sabalites dindoriensis* R. Srivastava, G. Srivastava and D. L. Dilcher sp. nov.

## Discussion

### Modern distribution of palms and their ecology

Palms are largely distributed and diversified in tropical areas [5,76] with 90% of the species diversity restricted to tropical rainforest [1]. They are much less prominent and diverse in temperate regions [5,77,78], thus showing very restricted frost tolerance [77]. The low frost tolerance of palms is considered to be an evolutionarily conserved trait. Their architecture and more notably a crown composed of large evergreen leaves [79], which has limited frost resistance [80] and unique stem physiology doesn't allow dormancy [81]. Palms also exhibit a strong latitudinal diversity gradient [82] and need water accessibility for their survival [5,83]. Palms grow mainly under the top canopy of tropical rain forests along low hills and streams in warm and humid conditions, while a few grow in open areas. They are also dominant in coastal swamps and mangrove forests [8,84]. Studies of new world palms indicate that solar radiation as related to absolute latitude and water is the main factor that determines the richness of palms species [85]. However, the subfamily Coryphoideae is distributed in a wider range of habitats such as pantropical to warm temperate areas of the world (Fig. 7). It is also found in climatic extremes such as cold and arid regions [5].

### Origin and possible migratory path of the Coryphoideae from the Northern Hemisphere to Indian subcontinent

Phylogenetic and molecular clock studies indicate that the palms originated and diversified in Laurasia around 100 Ma [1,10] while the coryphoids diverged at about 87 Ma (95% HPD 86–88) which was constrained by the calibration point from a *Sabalites* fossil [9,10] and diversified during the Late Cretaceous to Cenozoic in boreotropical regions [5,86]. The subfamily Coryphoideae includes four major clades including (1) New world thatch palm

**Table 1.** Fossil palm leaves from Upper Cretaceous–Neogene sediments of India.

| Fossil species/References                                | Locality/Horizon                                  | Age                                       |
|----------------------------------------------------------|---------------------------------------------------|-------------------------------------------|
| Fossil palm leaf and stem [46]                           | Polgaon, DIB Nagpur                               | Maastrichtian                             |
| <i>Amesoneuron borassoides</i> Bonde [47]                | Chhindwara, DIB                                   | Maastrichtian–Danian                      |
| <i>A. deccanensis</i> Guleria and Mehrotra [48,50]       | Seoni and Dindori, DIB; East Garo Hills; Tura Fm. | Maastrichtian–Danian;<br>Upper Palaeocene |
| <i>A. ladakhensis</i> Mehrotra et al. [49]               | Hemis Conglomerate Horizon, Ladakh                | Late Eocene–Oligocene                     |
| <i>A. lakhanpali</i> Mehrotra [50]                       | East Garo Hills; Tura Fm.                         | Upper Palaeocene                          |
| <i>A. manipurensis</i> Guleria et al. [51]               | Imphal                                            | Late Eocene                               |
| <i>sahnii</i> Guleria et al. [52]                        | Solan; Kasauli Fm.                                | Lower Miocene                             |
| <i>A. siwalicus</i> Prasad [53]                          | Jawalamukhi, Siwalik                              | Middle Miocene                            |
| Borassiod palm leaf [54]                                 | Chhindwara, DIB                                   | Maastrichtian–Danian                      |
| Palm leaves [55]                                         | East Godavari, east of Rajahmundry                | Late Tertiary                             |
| <i>Livistona wadiyai</i> Lakhanpal et al. [56]           | Hemis Conglomerate Horizon, Ladakh                | Late Eocene–Oligocene                     |
| cf. <i>Iguanura wallichiana</i> Srivastava et al. [57]   | Tinsukia, Makum; Tikak Parbat Fm.                 | Late Oligocene                            |
| <i>Malpophyllum dakshinens</i> Kumaran [58]              | Chhindwara, DIB                                   | Maastrichtian–Danian                      |
| <i>Malpophyllum</i> sp. [58]                             | Solan; Kasauli Fm.                                | Lower Miocene                             |
| <i>Nypa fruticans</i> Wurm [59]                          | Tinsukia, Makum; Tikak Parbat Fm.                 | Late Oligocene                            |
| <i>Palmacites</i> sp. [50]                               | Barail; Tirap                                     | Oligocene                                 |
| <i>Palmacites</i> sp. [60]                               | Kangra, Ranital; Lower Siwalik                    | Middle Miocene                            |
| <i>P. khariensis</i> Lakhanpal and Guleria [61]          | Kutch, Khari Series                               | Miocene                                   |
| <i>P. makumensis</i> Srivastava et al. [57]              | Tinsukia, Makum; Tikak Parbat Fm.                 | Late Oligocene                            |
| <i>P. tsokarensis</i> Paul et al. [62]                   | Hemis Conglomerate Horizon, Ladakh                | Late Eocene–Oligocene                     |
| <i>Phoenicites</i> sp. [63,64]                           | Tura Fm., Garo Hills Laisong Fm.                  | Eocene Late Eocene–Oligocene              |
| <i>P. indica</i> Guleria et al. [51]                     | Imphal                                            | Late Eocene                               |
| <i>P. siwalikensis</i> Bonde [65]                        | Darjeeling; Middle Siwalik                        | Miocene                                   |
| <i>P. lakhanpali</i> Guleria and Mehrotra [48]           | Seoni; DIB                                        | Maastrichtian–Danian                      |
| <i>Sabalites</i> sp. [66,67]                             | Near Chakoti river, Jhelum, Kashmir;              | Miocene                                   |
|                                                          | Solan, Kasauli Fm.                                | Lower Miocene                             |
| <i>S. microphylla</i> Sahni [66]                         | Solan, Kasauli Fm.                                | Lower Miocene                             |
| <i>Sabalophyllum livistonoides</i> Bonde [68]            | Nawargaon, DIB                                    | Maastrichtian–Danian                      |
| <i>Trachycarpus ladakhensis</i> Lakhanpal et al. [69,70] | Ladakh, Liyan Fm.; Lower Siwalik                  | Miocene; Early Miocene;                   |
| <i>Zalaccites jaintiensis</i> Burman and Daura [71]      | Khasi and Jaintia Hills                           | Palaeocene                                |

DIB: Deccan Intertrappean Beds; Fm.: Formation.  
doi:10.1371/journal.pone.0111738.t001

clade consisting of tribes Sabaleae and Cryosophileae; (2) Syncarpous clade consisting of tribes Chuniophoeniceae, Caryoteae, Coryphae and Borasseae; (3) tribe Phoeniceae and (4) tribe Trachycarpeae [5,87]. Based on molecular phylogenetic analysis, Baker and Couvreur [9] suggested that the New world thatch palm clade diverged at 55 Ma (95% HPD 39–72) in North America. The Syncarpous clade diverged in Eurasia at 66 Ma (95% HPD 51–80). The tribe Phoeniceae diverged from Trachycarpeae around 49 Ma (95% HPD 33–65) in Eurasia. Out of the four aforesaid clades, the syncarpous clade is the earliest diverging clade (66 Ma) that also corresponds to the age of Deccan Intertrappean beds to which our fossils belong. In syncarpous clade, the Caryoteae can be differentiated from the present fossil by having pinnate or bipinnate leaves while amongst Chuniophoeniceae, Coryphae and Borasseae the fossil probably shows near resemblance with floral axis of *Hyphaene* (Borasseae) by having the characteristic shape and striate bractioles which also corroborate with the previous fossil records of *Hyphaene* from the

same horizon [15,18,20]. In the subsequent study Baker and Couvreur [10] suggested that only one dispersal event occurred from Indian Ocean into India (including Sri Lanka) during the Miocene but the palm fossils reported from the Maastrichtian–Danian sediments of Deccan Intertrappean beds [39] opens a new dispersal route (Fig. 8).

The oldest fossil records of Coryphoideae are reported from the Northern Hemisphere, such as: *Sabalites carolinensis* [13] from late Coniacian–early Santonian of South Carolina and *Sabal bigbendense* Manchester, Lehman and Wheeler [88] from Maastrichtian of Texas, USA. *Sabalites longirhachis* [14] were reported from the lower Campanian of Austria and from the Maastrichtian of the Pyrénées [75].

The fossil records show that the continent of Africa and India possessed much richer palm flora in the past than at present. In Africa, there are definite evidences of palm pollen from the Campanian (83.5–70.6 Ma) and they became much abundant and more diverse during the Maastrichtian (70–65.5 Ma). This period

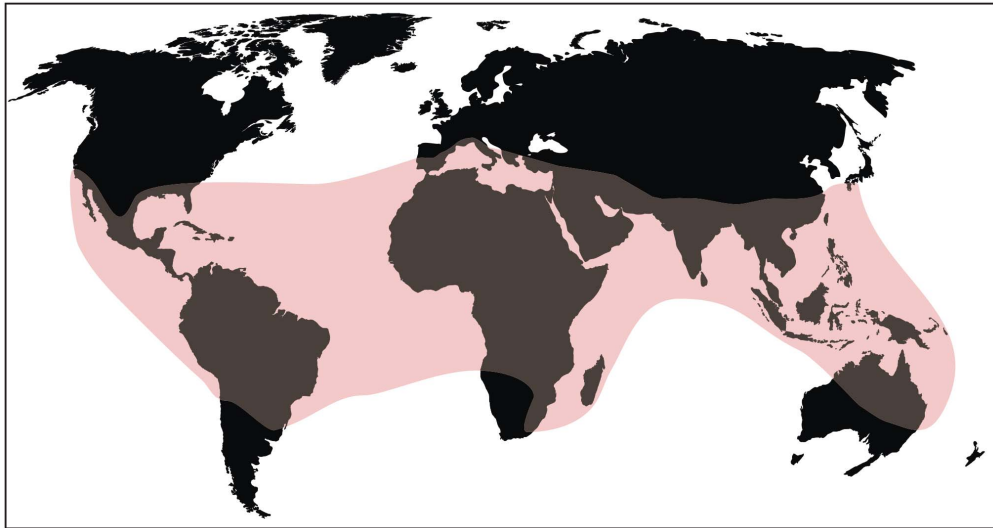

**Figure 7. World map showing modern distribution of Coryphoideae [5].**  
doi:10.1371/journal.pone.0111738.g007

is referred as ‘Late Cretaceous Palm Province’ [8,89]. The subfamilies such as Nypoideae and Calamoideae have been recorded from the Maastrichtian [90,91], the Coryphoideae in the form of seed has been recorded from the Danian (65.5–61.7 Ma) sediments of Egypt [92]. A large number of fossils attributed to Coryphoideae have been reported from the Deccan Intertrappean sediments such as: *Hyphaeocarpon indicum* [15], *Palmocarpon coryphoidium* [16], *Palmocaulon costapalmatum* [17], *P. hyphaeneoides* [18], *Palmoxylon coryphoides* [19] and *P. hyphaeneoides*

[20]. It is interesting to note that several of the *Palmoxylon* species reported from the Upper Cretaceous sediments of the Indian subcontinent [66] have also been reported from the late Eocene to early Miocene sediments of Egypt [93].

All the above fossil records and the similarity in coryphoid fossil palm records between India and Africa suggest that the coryphoid palms probably dispersed into India from Europe via Africa. During the Early Cretaceous the Indian plate was separated from the other Gondwana continents and moved northward. It collided with the Kohistan-Ladakh arc at ~85 Ma (an island like structure) re-establishing the land connection between India and Africa ~70 Ma [24]. This facilitated the interchange of various plants and also several Maastrichtian dinosaurs [24]. During the Campanian–Maastrichtian, Africa was also connected with Europe by land [94], which most likely facilitated the entry of coryphoid palms from Europe to Africa. Thus, the migration model of coryphoid palms we propose (Fig. 8) fits well with the plate tectonic models. However, with the aforesaid model, long distance oceanic dispersal cannot be ruled out [9,10]. In future better preserved palm fossils assignable to modern genera are needed to further strengthen the proposed model.

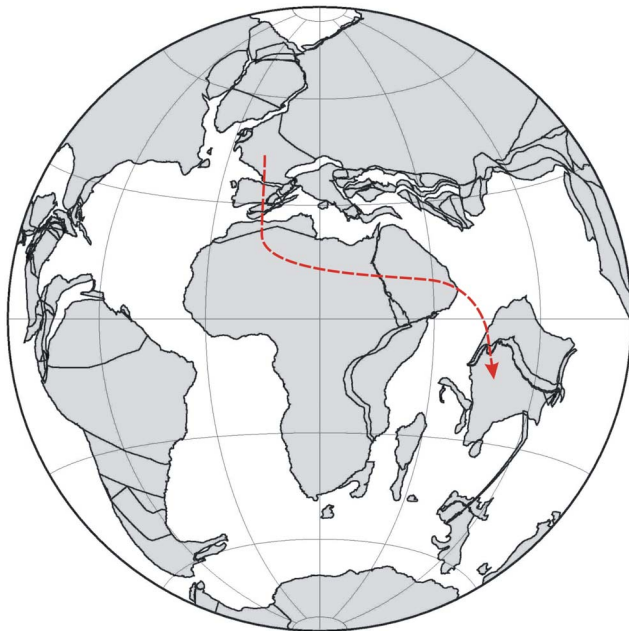

**Figure 8. Palaeogeographic map at 65.5 Ma [21] showing possible dispersal path of Coryphoideae from Europe to India via Africa (red broken line).**  
doi:10.1371/journal.pone.0111738.g008

## Acknowledgments

We are thankful to Prof. Sunil Bajpai, Director, Birbal Sahni Institute of Palaeobotany, Lucknow for permission to publish the paper. We are also indebted to the Directors, Botanical Survey of India, Kolkata, Forest Research Institute, Dehradun and National Botanical Research Institute, Lucknow for permission to consult their herbaria. RS thanks Dr. J. S. Guleria (Retired Scientist) of Birbal Sahni Institute of Palaeobotany, Lucknow for his help during the field work. Thanks are also due to Mr. Pawan Kumar for the line drawings. We are extremely grateful to the two anonymous reviewers and Prof. Qi Wang (Academic Editor) for their invaluable constructive comments for improving the manuscript.

## Author Contributions

Conceived and designed the experiments: RS GS DLD. Performed the experiments: RS GS DLD. Analyzed the data: RS GS DLD. Contributed reagents/materials/analysis tools: RS. Wrote the paper: RS GS DLD.



## References

- Couvreur TLP, Forest F, Baker WJ (2011) Origin and global diversification patterns of tropical rain forests: inferences from a complete genus-level phylogeny of palms. *BMC Biology* 9: 44.
- Chase MW, Fay MF, Devey DS, Maurin O, Ronsted N, et al. (2006) Multigene analyses of monocot relationships: A summary. *Aliso* 22: 63–75.
- Davis JI, Petersen G, Seberg O, Stevenson DW, Hardy CR, et al. (2006) Are mitochondrial genes useful for the analysis of monocot relationships?. *Taxon* 55: 857–870.
- Dransfield J, Uhl NW, Asmussen CB, Baker WJ, Harley MM, et al. (2005) A new phylogenetic classification of the palm family, Arecaceae. *Kew Bulletin* 60: 559–569.
- Dransfield J, Uhl NW, Asmussen CB, Baker WJ, Harley MM, et al. (2008) *Genera Palmarum: The evolution and classification of palms*. Kew, UK, Royal Botanic Gardens.
- Govaerts R, Dransfield J (2005) *World checklist of palms*. UK, Kew: Royal Botanic Gardens.
- Mabberley DJ (2005) *The plant book, a portable dictionary of the vascular plants*. Cambridge: Cambridge University Press.
- Morley RJ (2000) *Origin and evolution of tropical rain forests*. Chichester: John Wiley and Sons, Ltd.
- Baker WJ, Couvreur TLP (2013) Global biogeography and diversification of palms sheds light on the evolution of tropical lineages. I. Historical biogeography. *Journal of Biogeography* 40: 274–285.
- Baker WJ, Couvreur TLP (2013) Global biogeography and diversification of palms sheds light on the evolution of tropical lineages. II. Diversification history and origin of regional assemblages. *Journal of Biogeography* 40: 286–298.
- Kulkarni AR, Mulani RM (2004) Indigenous palms of India. *Current Science* 86 (12): 1598–1603.
- Asmussen CB, Baker WJ, Dransfield J (2000) Phylogeny of the palm family (Arecaceae) based on *rps16* intron and *trnL-trnF* plastid DNA sequences. In: Wilson K, Morrison D, (Eds), *Proceedings of II International Conference on Comparative Biology of Monocotyledons*. Australia, Sydney: CSIRO. pp. 525–535.
- Berry EW (1914) *The Upper Cretaceous and Eocene floras of South Carolina and Georgia*. US Geological Survey professional paper 84: 5–200.
- Kvaček J, Herman AB (2004) Monocotyledons from Early Campanian (Cretaceous) of Grunbach, Lower Austria. *Review of Palaeobotany and Palynology* 128: 323–353.
- Bande MB, Prakash U, Ambwani K (1982) A fossil palm fruit *Hyphaeocarpon indicum* gen. et sp. nov. from the Deccan Intertrappean beds of India. *Palaeobotanist* 30(3): 303–309.
- Shete RH, Kulkarni AR (1985) *Palmocarpon coryphoidium* sp. nov., a coryphoid palm fruit from the Deccan Intertrappean beds of Wardha District, Maharashtra. *Journal of the Indian Botanical Society* 64: 45–50.
- Kulkarni AR, Patil KS (1977) *Palmocaulon costapalmatum*, a petrified palm leaf axis from the Deccan Intertrappean beds of Wardha District, Maharashtra. *Geophytology* 7(2): 208–213.
- Shete RH, Kulkarni AR (1980) *Palmocaulon hyphaeoides* sp. nov. from the Deccan Intertrappean beds of Wardha District, Maharashtra, India. *Palaontographica* B172: 117–124.
- Ambwani K, Mehrotra RC (1990) A new fossil palm wood from the Deccan Intertrappean bed of Shahpura, Mandla District, Madhya Pradesh. *Geophytology* 19(1): 70–75.
- Rao GV, Shete RR (1989) *Palmoxylon hyphaeoides* sp. nov. from the Deccan Intertrappean beds of Wardha District, Maharashtra. In: N V . Biradar, *Proceedings of Special Indian Geophytological Conference Poona*. pp. 123–128.
- <http://www.odsn.de/odsn/index.html> (accessed 2013 May 19).
- Jay AE, Widdowson M (2008) Stratigraphy, structure and volcanology of the SE Deccan continental flood basalt province: implications for eruptive extant and volumes. *Journal of the Geological Society, London* 165: 177–188.
- Smith AG, Smith DG, Funnell M (1994) *Atlas of Mesozoic and Cenozoic coastlines*. Cambridge: Cambridge University Press.
- Chatterjee S, Goswami A, Scotese CR (2013) The longest voyage: Tectonic, magmatic, and palaeoclimatic evolution of Indian plate during its northward flight from Gondwana to Asia. *Gondwana Research* 23: 238–267.
- Sheth HC, Pande K, Bhutani R (2001)  $^{40}\text{Ar}/^{39}\text{Ar}$  ages of Bombay trachytes: evidence for a Palaeocene phase of Deccan volcanism. *Geophysical Research Letters* 28: 3513–3516.
- Chenet AL, Courtillot V, Fluteau F, Gérard M, Quidelleur X, et al. (2009) Determination of rapid Deccan eruptions across the Cretaceous–Tertiary boundary using paleomagnetic secular variation: 2. Constraints from analysis of eight new sections and synthesis for a 3500-m-thick composite section. *Journal of Geophysical Research* 114: B06103.
- Hofmann C, Feraud G, Courtillot V (2000)  $^{40}\text{Ar}/\text{Ar}^{40}$  dating of mineral separates and whole rocks from the Western Ghats lava pile: further constraints on duration and age of the Deccan traps. *Earth and Planetary Science Letters* 180: 13–27.
- Sahni B (1934) The Deccan Traps: Are they Cretaceous or Tertiary? *Current Science* 3: 134–136.
- Bande MB (1992) The Palaeogene vegetation of Peninsular India (megafossil evidences). *Palaeobotanist* 40: 275–284.
- Kar RK, Srinivasan S (1988) Late Cretaceous palynofossils from the Deccan Intertrappean beds of Mohgaon-Kalan, Chhindwara District, Madhya Pradesh. *Geophytology* 27: 17–22.
- Khosla A, Sahni A (2003) Biodiversity during the Deccan volcanic eruptive episode. *Journal of Asian Earth Sciences* 21: 895–908.
- Samant B, Mohabey DM (2005) Response of flora to Deccan volcanism: A case study from Nand-Dongargaon basin of Maharashtra, implications to environment and climate. *Gondwana Geological Magazine Special Publication* 8: 151–164.
- Samant B, Mohabey DM (2009) Palynoflora from Deccan volcano-sedimentary sequence (Cretaceous-Palaeogene transition) of central India: implications for spatio-temporal correlation. *Journal of Biosciences* 34 (5): 811–823.
- Venkatesan TR, Pande K, Gopalan V (1993) Did Deccan volcanism predate the Cretaceous-Tertiary transition? *Earth and Planetary Science Letters* 119: 181–189.
- Shukla PN, Shukla AD, Bhandari N (1997) Geochemical characterization of the Cretaceous-Tertiary sediments at Anjar, India. *Palaeobotanist* 46(1–2): 127–132.
- Khosla SC (1999) *Costaburtonia*, a new genus of ostracoda from the Intertrappean beds (Paleocene) of east coast of India. *Micropalaeontology* 45: 319–323.
- Keller G, Adatte T, Bajpai S, Mohabey DM, Widdowson M, et al. (2009) K-T Transition in Deccan Traps of central India marks major marine seaway across India. *Earth and Planetary Science Letters* 282: 10–23.
- Cripps JA, Widdowson M, Spicer RA, Jolly DW (2005) Coastal ecosystem response to late stage Deccan Trap volcanism: the post K-T boundary (Danian) palynofacies of Mumbai (Bombay), west India. *Paleogeography, Paleoclimatology, Paleoecology* 216(1–4): 303–332.
- Srivastava R (2011) Indian Upper Cretaceous-Tertiary flora before collision of Indian Plate: A reappraisal of central and western Indian flora. *Memoir of the Geological Society of India* 77: 281–292.
- Lakhanpal RN, Maheshwari HK, Awasthi N (1976) *A catalogue of Indian fossil plants*. Lucknow: Birbal Sahni Institute of Palaeobotany.
- Srivastava R (1991) *A catalogue of fossil plants from India—4. Cenozoic (Tertiary) megafossils*. Lucknow: Birbal Sahni Institute of Palaeobotany.
- Srivastava R, Guleria JS (2005) *A catalogue of Cenozoic (Tertiary) plant megafossils from India (1989–2005)*. Lucknow: Birbal Sahni Institute of Palaeobotany.
- Read RW, Hickey LJ (1972) A revised classification of fossil palm and palm-like leaves. *Taxon* 21: 129–137.
- Saporta G (1865) Études sur la végétation du sud-est de la France a l'époque tertiaire. *Annales des Sciences Naturelles (Botanique)* 5(3): 5–152.
- The Herbarium Catalogue, Royal Botanic Garden, Kew. Published on internet <http://www.kew.org/hercat> (accessed 2014 August 18).
- Mohabey DM (1986) Depositional environment of Lameta Formation (Late Cretaceous) of Nand-Dongargaon inland basin, Maharashtra. The fossil and lithological evidences. *Memoir of the Geological Society of India* 37: 363–386.
- Bonde SD (1986) *Amesoneuron borassoides* sp. nov., a borassoid palm leaf from Deccan Intertrappean beds at Mohgaonkalan, India. *Biovigyanam* 12: 89–91.
- Guleria JS, Mehrotra RC (1999) On some plant remains from Deccan Intertrappean localities of Seoni and Mandla districts of Madhya Pradesh, India. *Palaeobotanist* 47: 68–87.
- Mehrotra RC, Ram-Avatar, Sharma A, Phartiyal B (2007) A new palm leaf from the Indus suture zone, Ladakh Himalayas, India. *Journal of Palaeontological Society of India* 52: 159–162.
- Mehrotra RC (2000) Study of plant megafossils from the Tura Formation of Nangwalbibra, Garo Hills, Meghalaya, India. *Palaeobotanist* 49(2): 225–237.
- Guleria JS, Singh Hemanta RK, Mehrotra RC, Soibam I, Kishor R (2005) Palaeogene plant fossils of Manipur and their palaeoecological significance. *Palaeobotanist* 54: 61–77.
- Guleria JS, Srivastava R, Prasad M (2000) Some fossil leaves from the Kasauli Formation of Himachal Pradesh, North-West India. *Himalayan Geology* 21(1–2): 43–52.
- Prasad M (2006) Siwalik plant fossils from the Himalayan foot-hills of Himachal Pradesh, India and their significance on palaeoclimate. *Phytomorphology* 56(1–2): 9–22.
- Trivedi BS, Chandra R (1971) A palm leaf from the Deccan Intertrappean Series, Mohgaon Kalan (M. P.), India. *Current Science* 40(19): 526–527.
- Mahabale TS, Rao SV (1968) Fossil palm remains from Bommuru, Andhra Pradesh. *Current Science* 37(6): 158–159.
- Lakhanpal RN, Sah SCD, Sharma KK, Guleria JS (1983) Occurrence of *Livistona* in the Hemis conglomerate Horizon of Ladakh: In: Sharma K K, Thakur V C, *Geology of Indus Suture Zone of Ladakh*, Wadia Institute of Himalayan Geology, Dehradun. pp. 179–185.
- Srivastava G, Mehrotra RC, Bauer H (2012) Palm leaves from the Late Oligocene sediments of Makum Coalfield, Assam, India. *Journal of Earth System Sciences* 121(3): 747–754.
- Kumaran KPN (1994) *Malpophyllum*, a new name for the fossil genus *Palmophyllum* Conwentz, 1886. *Review of Palaeobotany and Palynology* 81 (2–4): 337–338.

59. Mehrotra RC, Tiwari RP, Mazumder BI (2003) *Nyba* megafossils from the Tertiary sediments of Northeast India. *Geobios* 36: 83–92.
60. Singh RR, Patnayak R (2012) A fossil palm leaf impression from ~11.2 Ma old, Siwalik deposits of Kangra Valley, Himachal Pradesh. *Journal of the Geological Society of India* 79: 85–88.
61. Lakhanpal RN, Guleria JS (1982) Plant remains from Miocene of Kachchh, western India. *Palaeobotanist* 30(3): 279–296.
62. Paul SK, Ram-Awatar, Mehrotra RC, Sharma A, Phartiyal B, et al. (2007) A new palm leaf from the Hemis Formation of Ladakh, Jammu and Kashmir, India. *Current Science* 92: 727–729.
63. Lakhanpal RN (1964) A new record of angiospermic leaf impressions from the Garo Hills, Assam. *Current Science* 33(9): 276.
64. Singh MC, Kushwaha RAS, Srivastava G, Mehrotra RC (2012) New plant remains from the Laisong Formation of Manipur. *Journal of the Geological Society of India* 79: 287–294.
65. Bonde SD (2008) Indian fossil monocotyledons: Current status, recent developments and future directions. *Palaeobotanist* 57: 141–164.
66. Sahni B (1964) Revision of Indian fossil plants. Part III, Birbal Sahni Institute of Palaeobotany, Lucknow.
67. Mathur AK, Mishra VP, Mehra S (1996) Systematic study of plant fossils from Dagshai, Kasauli and Dharamsala formations of Himachal Pradesh. *Palaeontologia Indica (New Series)*, Geological Survey of India 1: 1–68.
68. Bonde SD (1986) *Sabalophyllum trivistonoides* gen. et sp. nov. a petrified palm leaf segment from Deccan Intertrappean beds at Nawargaon, District Wardha, Maharashtra, India. *Bioivyanam* 12: 113–118.
69. Lakhanpal RN, Prakash G, Thussu JL, Guleria JS (1984) A fan palm from the Liyan Formation of Ladakh (Jammu and Kashmir). *Palaeobotanist* 31(3): 201–207.
70. Kapoor R, Singh RY (1987) A note on the geology and distribution of some significant fossils in the lower Tertiary sediments exposed along Kalka- Kasauli road section. *Bulletin Indian Geological Association* 20(1): 17–23.
71. Barman G, Duara BK (1970) *Zalaccites jaintiensis* gen. et sp. nov. from the plateau (Cherra) sandstones of the Jaintia Hills, United Khasi and Jaintia Hills District, Assam, India. *Science and Culture* 36(1): 63–64.
72. Daghlia CP (1976) Coryphoid palms from the lower and middle Eocene of southeastern North America. *Palaeontographica* 166B: 44–82.
73. Zhou WJ, Liu XY, Xu QQ, Huang KY, Jin JH (2013) New coryphoid fossil palm leaves (Arecaceae: Coryphoideae) from the Eocene Changchang Basin of Hainan Island, South China. *Science China: Earth Sciences* 56: 1493–1501.
74. Huzioka K, Takahashi E (1970) The Eocene flora of the Ube Coal-field, southwest Honshu, Japan. *Journal of the Mining College, Akita University Series A* 4(5): 1–88.
75. Marmi J, Gomez B, Closas CM, Brevia SV (2010) A reconstruction of the fossil palm *Sabalites longivachis* (Unger) J. Kvaček et Herman from the Maastriachian of Pyrenees. *Review of Palaeobotany and Palynology* 163: 73–83.
76. Walther G-R, Gritti ES, Berger S, Hickler T, Tang Z, et al. (2007) Palms tracking climate change. *Global Ecology and Biogeography* 16: 801–809.
77. Jones DL (1995) Palms throughout the world. Chatswood: Reed Books.
78. Gibbons M (2003) A pocket guide to palms. London: PRC Publishing Ltd.
79. Tomlinson PB (1990) The structural biology of palms. Oxford: Clarendon Press.
80. Woodward FI (1988) Climate and plant distribution. Cambridge: Cambridge University Press.
81. Tomlinson PB (2006) The uniqueness of palms. *Botanical Journal of Linnean Society* 151: 5–14.
82. Bjorholm S, Svenning JC, Skov F, Balslev H (2005) Environmental and spatial controls of palm (Arecaceae) species richness across the Americas. *Global Ecology and Biogeography* 14: 423–429.
83. Punyasena SW, Eshel G, McElwain JC (2008) The influence of climate on the spatial patterning of neotropical plant families. *Journal of Biogeography* 35: 117–130.
84. Jacobs BF (2004) Palaeobotanical studies from tropical Africa: relevance to the evolution of forest, woodland and savannah biomes. *Philosophical Transactions of the Royal Society, London B* 359: 1573–1583.
85. Svenning JC, Borchsenius F, Bjorholm S, Balslev H (2008) High tropical net diversification drives the New World latitudinal gradient in palm (Arecaceae) species richness. *Journal of Biogeography* 35: 394–406.
86. Bjorholm S, Svenning JC, Baker WJ, Skov F, Balslev H (2006) Historical legacies in the geographical diversity patterns of New World palm (Arecaceae) subfamilies. *Botanical Journal of the Linnean Society* 151: 113–125.
87. Asmussen CBJ, Dransfield J, Deickmann V, Barfod AS, Pintaud J-C, et al. (2006) A new subfamily classification of the palm family (Arecaceae): evidence from plastid DNA phylogeny. *Botanical Journal of Linnean Society* 151: 15–38.
88. Manchester SR, Lehman TM, Wheeler EA (2010) Fossil palms (Arecaceae, Coryphoideae) associated with juvenile herbivorous dinosaurs in the upper Cretaceous Aguja Formation, Big Bend National Park, Texas. *International Journal of Plant Sciences* 171(6): 679–689.
89. Hermsgreen GFW, Chlonova AF (1981) Cretaceous microfloral provinces. *Pollen et Spores* 23: 441–555.
90. Hermsgreen GFW, Kedves M, Rovinina LV, Smirnova SB (1996) Cretaceous palynofloral provinces: a review. In: Jansonius J, Mcgregor D C, Palynology: principles and applications. Dallas: American Association of Stratigraphic Palynologists Foundation. pp. 1157–1188.
91. El-Soughier MI, Mehrotra RC, Zhi-Yan Z, Gong-Le S (2011) *Nyba* fruits and seeds from the Maastriachian–Danian sediments of Bir Abu Munqar, south western desert, Egypt. *Palaeoworld* 20: 75–83.
92. Gregor HJ, Hagn H (1982) Fossil fructifications from the Cretaceous–Palaeocene Boundary of SW-Egypt (Danian, Bir Abu Munqar). *Tertiary Research* 4: 121–147.
93. EL- Saadawi W, Youssef SG, Kamal-El-Din MM (2004) Fossil palm woods of Egypt: II Seven Tertiary *Palmoxylon* species new to the country. *Review of Palaeobotany and Palynology* 129: 199–211.
94. Ezcurra MD, Agnolín FL (2012) A new global palaeobiogeographical model for the Late Mesozoic and early Tertiary. *Systematic Biology* 61(4): 553–566.
95. Survey of India (1950) Toposheet No. 64A.
